# Supplementary material
Source: PubMed Central journal article supplement (PMC1626135)
Supplement: JCI0628326sd.pdf [file JCI0628326sd.pdf]

**A**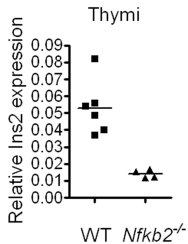**B**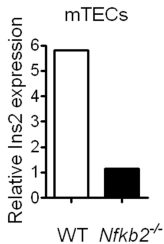**C**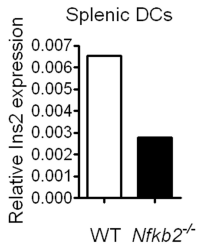

**Supplementary Figure 1. Insulin 2 expression is reduced in the absence of Nf- $\kappa$ b2.**

(A) Real-time PCR analysis of *Ins2* expression in 5-7 week-old *Nfkb2*<sup>-/-</sup> and wild type thymus. Expression values are shown in arbitrary units and normalized relative to *Gapdh*.  $P < 0.05$ . (B) Real-time PCR analysis of *Ins2* expression from purified mTECs of 5-7 week-old *Nfkb2*<sup>-/-</sup> and wild type thymus. Expression values are shown in arbitrary units, normalized relative to *Keratin14*. Data are representative of three experiments. (C) Real-time PCR analysis of *Ins2* expression in purified splenic DCs. Expression values are shown in arbitrary units and normalized relative to *Gapdh*. Data are representative of two experiments.
